# Supplementary material for: High genetic diversity but no geographical structure of Aedes albopictus populations in Réunion Island
Source: Springer Nature journal article supplement (doi:10.1186/s13071-019-3840-x), 2019-12-01
Supplement: MOESM1 [file 13071_2019_3840_MOESM1_ESM.pdf]

**Additional file 1: Table S1.** Environmental characteristics of the 19 sampling sites of *Aedes albopictus* in Reunion Island.

| Region | Site | X       | Y        | Altitude<br>(m) | Mean<br>temperature<br>(°C) | Mean rainfall<br>(mm) | Vegetation type         | Land use          |
|--------|------|---------|----------|-----------------|-----------------------------|-----------------------|-------------------------|-------------------|
| West   | PRO  | 55.4564 | -20.8965 | 36              | 24.25                       | 1340                  | Semi-arid forest        | Urbanized area    |
|        | LPO  | 55.2875 | -20.9493 | 9               | 25.45                       | 490                   | Savannah                | Urbanized area    |
|        | ERM  | 55.2326 | -21.0535 | 67              | 24.95                       | 540                   | Savannah                | Urbanized area    |
|        | P3B  | 55.2647 | -21.125  | 35              | 24.95                       | 640                   | Semi-arid forest        | Savannah          |
|        | ESL  | 55.3091 | -21.1739 | 437             | 19.1                        | 970                   | Semi-arid forest        | Sugar cane        |
|        | PLA  | 55.3366 | -21.243  | 331             | 24                          | 660                   | Savannah                | Urbanized area    |
|        | LDP  | 55.4859 | -21.3231 | 136             | 23.3                        | 800                   | Semi-arid forest        | Urbanized area    |
|        | PGB  | 55.5332 | -21.3615 | 75              | 23.3                        | 1340                  | Savannah                | Urbanized area    |
|        | SJO  | 55.6114 | -21.3862 | 28              | 23.3                        | 1540                  | Low altitude rainforest | Urbanized area    |
| East   | PCP  | 55.7125 | -21.3732 | 46              | 23.15                       | 3460                  | Low altitude rainforest | Forest/Sugar cane |
|        | PCD  | 55.8011 | -21.3057 | 124             | 23.45                       | 3700                  | Low altitude rainforest | Forest/Sugar cane |
|        | PNDL | 55.8243 | -21.1653 | 60              | 23.45                       | 3250                  | Low altitude rainforest | Sugar cane        |
|        | PBSB | 55.7232 | -21.0488 | 43              | 23.55                       | 3110                  | Low altitude rainforest | Sugar cane        |
|        | PDA  | 55.6565 | -20.9262 | 20              | 20.5                        | 2130                  | Low altitude rainforest | Sugar cane        |
|        | PBS  | 55.5827 | -20.9324 | 314             | 20.5                        | 2630                  | Low altitude rainforest | Sugar cane        |
| Center | PTC  | 55.461  | -21.1772 | 972             | 16.7                        | 1150                  | Mountain rainforest     | Forest            |
|        | PHY  | 55.5384 | -21.2219 | 1161            | 13.9                        | 1440                  | Mountain rainforest     | Grassland         |
|        | PDP  | 55.6407 | -21.1276 | 948             | 16.75                       | 3830                  | Screwpine thickets      | Grassland         |
|        | PSA  | 55.5441 | -21.0242 | 449             | 18.75                       | 3280                  | Mountain rainforest     | Forest            |
