# Supplementary material for: High genetic diversity but no geographical structure of Aedes albopictus populations in Réunion Island
Source: Springer Nature journal article supplement (doi:10.1186/s13071-019-3840-x), 2019-12-01
Supplement: MOESM2 [file 13071_2019_3840_MOESM2_ESM.pdf]

**Additional file 2: Table S2.** Information on microsatellite loci used for the genotyping of *Aedes albopictus* populations. *Abbreviations:* F, forward; R, reverse.

| Marker     | Sequence                                               | Size range (bp) | Dye  | Multiplex | Quantity ( $\mu$ M) | References |
|------------|--------------------------------------------------------|-----------------|------|-----------|---------------------|------------|
| Aealbmic3  | F: ACCATACAGCCTGGAGTTCG<br>R: GGGGTTGTGTGAATTGTCGT     | 206-238         | VIC  | M1        | 2                   | [1]        |
| Aealbmic6  | F: GATGGTCCGTATTTGGGTTG<br>R: ATCTTCACTCATCCGCCATC     | 248-269         | PET  | M1        | 4                   | [1]        |
| Aealbmic8  | F: TTGTTGTTCCGGTTGTTGTTT<br>R: CGGGTTCCAACATGTACGA     | 225-235         | 6FAM | M1        | 6                   | [1]        |
| Albtri3    | F: AGATGTGTGCGCAATGCTTCC<br>R: GATTCCGGTGATGTTGAGGCC   | 119-131         | PET  | M1        | 2                   | [2]        |
| Albtri45   | F: TTTCAGCTCGGTGTTATGGC<br>R: TGATGTTGATGATGATGACTACGA | 116-133         | 6FAM | M1        | 2                   | [2]        |
| Aealbmic4  | F: ATCGCGGGTTTTCTATTCCCT<br>R: ATCAACGAAACCGAAAGCAT    | 172-187         | NED  | M2        | 1.6                 | [1]        |
| Aealbmic5  | F: AACCCATCGAACACAGAAGG<br>R: GTACGGTTGACTCGCTGTGA     | 148-222         | 6FAM | M2        | 1.6                 | [1]        |
| Aealbmic7  | F: ATAGACGGGAGTCGGTTCCT<br>R: TCCAACCGCTAGTGTCAATCA    | 200-215         | PET  | M2        | 1.6                 | [1]        |
| Aealbmic13 | F: TCACACCATGGTCAAAGCAT<br>R: TGCTGAGTTGAATGGAAACG     | 142-155         | VIC  | M2        | 2.5                 | [1]        |
| Albdi6     | F: TCTTCATCTACGCTGTGCTC<br>R: GACGCCAATCCGACAAAGTC     | 259-276         | VIC  | M2        | 2.5                 | [2]        |
| Aealbmic2  | F: ACGATGCGTAACCATTCGAT<br>R: AACACCGCCGAATATGAAAC     | 190-193         | PET  | M3        | 2.5                 | [1]        |
| Aealbmic9  | F: GCGATGACAGTGAACAAGA<br>R: GCTTGGCAGGGAACAAATTA      | 133-147         | VIC  | M3        | 1.2                 | [1]        |
| Aealbmic10 | F: ATCGCCTTCACTCTTCTCG<br>R: CCAATCTGAGCCGTACATT       | 171-182         | 6FAM | M3        | 4                   | [1]        |
| Aealbmic11 | F: CTCTGCGTTCGGTTCTATC<br>R: AGGCAACCTCTCGAATGAAA      | 213-234         | VIC  | M3        | 7                   | [1]        |
| Aealbmic12 | F: AGAGCCCTCGAAAAGAGAGC<br>R: AGCACTCATTCTTGGCTTGG     | 158-184         | NED  | M3        | 3                   | [1]        |
| Aealbmic16 | F: CACAACAACGAGAGTGTCGAA<br>R: CCGAGGGCAACACGATATAC    | 218-250         | 6FAM | M3        | 5.6                 | [1]        |

### References

1. Manni M, Gomulski LM, Aketarawong N, Tait G, Scolari F, Somboon P, et al. Molecular markers for analyses of intraspecific genetic diversity in the asian tiger mosquito, *Aedes albopictus*. *Parasit Vectors*. 2015;8:1–11.
2. Beebe NW, Ambrose L, Hill LA, Davis JB, Hapgood G, Cooper RD, et al. Tracing the tiger : Population genetics provides valuable insights into the *Aedes* (*Stegomyia*) *albopictus* invasion of the australasian region. *PLoS Negl Trop Dis*. 2013;7:e2361.
3. Peakall R, Smouse PE. GenAlEx 6.5: genetic analysis in Excel. Population genetic software for teaching and research-an update. *Bioinformatics*. 2012;28:2537–9.
