# Supplementary material for: High genetic diversity but no geographical structure of Aedes albopictus populations in Réunion Island
Source: Springer Nature journal article supplement (doi:10.1186/s13071-019-3840-x), 2019-12-01
Supplement: MOESM3 [file 13071_2019_3840_MOESM3_ESM.pdf]

**Additional file 3: Table S3.** Presence/absence of null alleles for each microsatellite locus in the 19 mosquito populations.

| Region                                      | Population | Aealbmic |      |             |             |     |     |      |     |      |      |             |             |      |             | Alb         |       |  |
|---------------------------------------------|------------|----------|------|-------------|-------------|-----|-----|------|-----|------|------|-------------|-------------|------|-------------|-------------|-------|--|
|                                             |            | 2        | 3    | 4           | 5           | 6   | 7   | 8    | 9   | 10   | 11   | 12          | 13          | 16   | di6         | tri3        | tri45 |  |
| West                                        | PRO        |          |      | •           | •           |     |     |      |     |      |      | •           | •           |      | •           | •           |       |  |
|                                             | LPO        |          |      | •           |             |     |     | •    |     |      | •    | •           | •           |      | •           | •           |       |  |
|                                             | ERM        |          |      | •           |             |     |     |      |     | •    |      | •           |             |      | •           | •           |       |  |
|                                             | P3B        |          |      | •           | •           |     |     | •    | •   | •    | •    | •           |             |      | •           | •           |       |  |
|                                             | ESL        |          |      | •           | •           |     |     | •    |     | •    | •    | •           | •           |      | •           | •           |       |  |
|                                             | PLA        |          |      | •           | •           |     |     |      |     |      | •    | •           | •           |      | •           |             |       |  |
|                                             | LDP        |          |      | •           | •           |     |     |      |     |      |      | •           | •           |      | •           | •           | •     |  |
|                                             | PGB        |          |      | •           | •           |     |     |      |     | •    |      | •           | •           |      | •           | •           | •     |  |
|                                             | SJO        |          |      | •           |             |     |     |      |     |      | •    | •           | •           |      | •           | •           | •     |  |
| East                                        | PCP        |          |      | •           | •           |     |     |      |     | •    |      | •           | •           |      |             | •           |       |  |
|                                             | PCD        |          | •    | •           | •           |     |     |      |     | •    |      | •           |             |      | •           |             |       |  |
|                                             | PNDL       |          |      |             | •           |     |     |      |     | •    | •    | •           |             |      | •           | •           |       |  |
|                                             | PBSB       |          |      | •           | •           |     |     | •    |     | •    | •    |             |             | •    | •           | •           | •     |  |
|                                             | PDA        |          |      | •           | •           |     |     |      |     | •    | •    | •           | •           |      | •           | •           |       |  |
|                                             | PBS        |          |      |             | •           |     | •   |      |     | •    |      | •           |             | •    | •           | •           |       |  |
| Center                                      | PTC        |          | •    | •           | •           |     |     |      |     |      |      | •           | •           |      |             |             |       |  |
|                                             | PHY        |          |      | •           | •           |     |     |      |     | •    |      | •           | •           |      | •           |             |       |  |
|                                             | PDP        |          | •    | •           | •           |     |     |      |     |      |      | •           | •           |      |             |             |       |  |
|                                             | PSA        |          |      | •           | •           |     |     |      |     | •    | •    |             | •           |      |             | •           |       |  |
| Percentage of populations with null alleles |            | 0.0      | 15.8 | <b>89.5</b> | <b>84.2</b> | 0.0 | 5.3 | 21.1 | 5.3 | 57.9 | 47.4 | <b>89.5</b> | <b>73.7</b> | 10.5 | <b>78.9</b> | <b>73.7</b> | 21.1  |  |

Presence: dotted boxes; Absence: empty boxes. Note that loci showing null alleles in more than 70% of the populations (in bold: Aealbmic4, Aealbmic5, Aealbmic12, Aealbmic13, Albdi6, Albtri3) were excluded from the analyses.
