# Supplementary material for: High genetic diversity but no geographical structure of Aedes albopictus populations in Réunion Island
Source: Springer Nature journal article supplement (doi:10.1186/s13071-019-3840-x), 2019-12-01
Supplement: MOESM4 [file 13071_2019_3840_MOESM4_ESM.pdf]

**Additional file 4: Table S4.** Microsatellite variation in the 19 *Aedes albopictus* populations. *Abbreviations:*  $n$ , number of individuals analyzed;  $N_a$ , number of alleles;  $N_e$ , effective number of alleles;  $N_p$ , number of private alleles;  $H_o$ , observed heterozygosities;  $H_E$ , expected heterozygosities;  $F_{IS}$ , inbreeding coefficient ( $*P < 0.05$ ,  $**P < 0.01$ ,  $***P < 0.001$ ); SE, standard error.

| Region | Sites            | Index    | Aealbmic |      |       |       |       |       |      |      |       | Albtri45 | All $\pm$ SE    |
|--------|------------------|----------|----------|------|-------|-------|-------|-------|------|------|-------|----------|-----------------|
|        |                  |          | 2        | 3    | 6     | 7     | 8     | 9     | 10   | 11   | 16    |          |                 |
| West   | W-PRO ( $n=25$ ) | $N_a$    | 2        | 12   | 4     | 4     | 5     | 7     | 4    | 8    | 7     | 6        | 5.90 $\pm$ 0.89 |
|        |                  | $N_e$    | 1.99     | 3.17 | 1.39  | 2.33  | 3.19  | 4.15  | 2.2  | 5.17 | 3.99  | 4.98     | 2.56 $\pm$ 0.41 |
|        |                  | $N_p$    | 0        | 0    | 0     | 0     | 0     | 1     | 0    | 0    | 1     | 0        | 2               |
|        |                  | $H_o$    | 0.36     | 0.6  | 0.32  | 0.6   | 0.72  | 0.76  | 0.44 | 0.72 | 0.68  | 0.72     | 0.59 $\pm$ 0.05 |
|        |                  | $H_E$    | 0.5      | 0.69 | 0.28  | 0.57  | 0.69  | 0.76  | 0.54 | 0.81 | 0.75  | 0.8      | 0.64 $\pm$ 0.05 |
|        |                  | $F_{IS}$ | 0.28     | 0.12 | -0.13 | -0.05 | -0.05 | 0     | 0.19 | 0.11 | 0.09  | 0.1      | 0.09 ***        |
|        | W-LPO ( $n=27$ ) | $N_a$    | 2        | 10   | 6     | 5     | 6     | 6     | 4    | 6    | 5     | 6        | 5.60 $\pm$ 0.64 |
|        |                  | $N_e$    | 1.8      | 3.76 | 2.38  | 2.76  | 3.89  | 3.46  | 1.94 | 3.44 | 2.31  | 4.4      | 3.01 $\pm$ 0.28 |
|        |                  | $N_p$    | 0        | 0    | 0     | 0     | 1     | 0     | 0    | 0    | 0     | 0        | 1               |
|        |                  | $H_o$    | 0.3      | 0.7  | 0.67  | 0.48  | 0.48  | 0.93  | 0.37 | 0.48 | 0.52  | 0.89     | 0.58 $\pm$ 0.07 |
|        |                  | $H_E$    | 0.44     | 0.73 | 0.58  | 0.64  | 0.74  | 0.71  | 0.49 | 0.71 | 0.57  | 0.77     | 0.64 $\pm$ 0.04 |
|        |                  | $F_{IS}$ | 0.33     | 0.04 | -0.15 | 0.24  | 0.35  | -0.3  | 0.24 | 0.32 | 0.08  | -0.15    | 0.11 **         |
|        | W-ERM ( $n=27$ ) | $N_a$    | 2        | 10   | 6     | 6     | 4     | 5     | 4    | 9    | 5     | 6        | 5.70 $\pm$ 0.75 |
|        |                  | $N_e$    | 1.91     | 4.6  | 1.92  | 1.85  | 3.19  | 3.26  | 2.02 | 4.67 | 3.01  | 3.71     | 3.01 $\pm$ 0.34 |
|        |                  | $N_p$    | 0        | 1    | 0     | 0     | 0     | 0     | 0    | 1    | 0     | 0        | 2               |
|        |                  | $H_o$    | 0.33     | 0.7  | 0.52  | 0.48  | 0.59  | 0.78  | 0.26 | 0.67 | 0.7   | 0.74     | 0.58 $\pm$ 0.06 |
|        |                  | $H_E$    | 0.48     | 0.78 | 0.48  | 0.46  | 0.69  | 0.69  | 0.51 | 0.79 | 0.67  | 0.73     | 0.63 $\pm$ 0.04 |
|        |                  | $F_{IS}$ | 0.3      | 0.1  | -0.08 | -0.05 | 0.14  | -0.12 | 0.49 | 0.15 | -0.05 | -0.01    | 0.1 **          |

**Additional file 4: Table S4.** Continued

|        |                       | Aealbmic        |       |       |      |       |      |       |      |      |       |          |                 |
|--------|-----------------------|-----------------|-------|-------|------|-------|------|-------|------|------|-------|----------|-----------------|
| Region | Sites                 | Index           | 2     | 3     | 6    | 7     | 8    | 9     | 10   | 11   | 16    | Albtri45 | All $\pm$ SE    |
| West   | W-P3B ( <i>n</i> =29) | N <sub>a</sub>  | 2     | 9     | 3    | 5     | 4    | 5     | 3    | 7    | 3     | 6        | 4.70 $\pm$ 0.68 |
|        |                       | N <sub>e</sub>  | 1.89  | 5.26  | 1.7  | 1.49  | 2.09 | 4     | 1.63 | 4.79 | 1.59  | 3.09     | 2.75 $\pm$ 0.45 |
|        |                       | N <sub>p</sub>  | 0     | 0     | 0    | 0     | 0    | 0     | 0    | 0    | 0     | 0        | 0               |
|        |                       | H <sub>o</sub>  | 0.48  | 0.79  | 0.38 | 0.34  | 0.34 | 0.59  | 0.21 | 0.52 | 0.38  | 0.79     | 0.48 $\pm$ 0.06 |
|        |                       | H <sub>E</sub>  | 0.47  | 0.81  | 0.41 | 0.33  | 0.52 | 0.75  | 0.39 | 0.79 | 0.37  | 0.68     | 0.55 $\pm$ 0.06 |
|        |                       | F <sub>IS</sub> | -0.03 | 0.02  | 0.08 | -0.05 | 0.34 | 0.22  | 0.46 | 0.35 | -0.02 | -0.17    | 0.14 ***        |
|        | W-ESL ( <i>n</i> =30) | N <sub>a</sub>  | 2     | 11    | 4    | 3     | 4    | 5     | 5    | 9    | 6     | 5        | 5.40 $\pm$ 0.86 |
|        |                       | N <sub>e</sub>  | 1.97  | 7.73  | 2.15 | 2.05  | 3.25 | 2.75  | 1.86 | 4.15 | 3.06  | 4.42     | 3.34 $\pm$ 0.56 |
|        |                       | N <sub>p</sub>  | 0     | 0     | 0    | 0     | 0    | 0     | 0    | 0    | 0     | 0        | 0               |
|        |                       | H <sub>o</sub>  | 0.47  | 0.93  | 0.5  | 0.5   | 0.53 | 0.6   | 0.33 | 0.6  | 0.67  | 0.67     | 0.58 $\pm$ 0.05 |
|        |                       | H <sub>E</sub>  | 0.49  | 0.87  | 0.53 | 0.51  | 0.69 | 0.64  | 0.46 | 0.76 | 0.67  | 0.77     | 0.64 $\pm$ 0.04 |
|        |                       | F <sub>IS</sub> | 0.05  | -0.07 | 0.06 | 0.02  | 0.23 | 0.06  | 0.28 | 0.21 | 0.01  | 0.14     | 0.11 **         |
|        | W-PLA ( <i>n</i> =30) | N <sub>a</sub>  | 2     | 11    | 4    | 3     | 6    | 5     | 5    | 7    | 5     | 5        | 5.30 $\pm$ 0.78 |
|        |                       | N <sub>e</sub>  | 1.97  | 6.21  | 1.47 | 1.62  | 4.23 | 2.97  | 2.08 | 4.01 | 3.3   | 3.76     | 3.16 $\pm$ 0.46 |
|        |                       | N <sub>p</sub>  | 0     | 0     | 0    | 0     | 0    | 0     | 0    | 0    | 0     | 0        | 0               |
|        |                       | H <sub>o</sub>  | 0.67  | 0.77  | 0.27 | 0.37  | 0.77 | 0.73  | 0.4  | 0.5  | 0.77  | 0.7      | 0.59 $\pm$ 0.06 |
|        |                       | H <sub>E</sub>  | 0.49  | 0.84  | 0.32 | 0.38  | 0.76 | 0.66  | 0.52 | 0.75 | 0.7   | 0.73     | 0.62 $\pm$ 0.06 |
|        |                       | F <sub>IS</sub> | -0.36 | 0.09  | 0.16 | 0.04  | 0    | -0.11 | 0.23 | 0.33 | -0.1  | 0.05     | 0.05 *          |

**Additional file 4: Table S4.** Continued

|        |                       | Aealbmic        |       |      |       |       |       |       |       |       |       |          |                 |
|--------|-----------------------|-----------------|-------|------|-------|-------|-------|-------|-------|-------|-------|----------|-----------------|
| Region | Sites                 | Index           | 2     | 3    | 6     | 7     | 8     | 9     | 10    | 11    | 16    | Albtri45 | All $\pm$ SE    |
| West   | W-LDP ( <i>n</i> =26) | N <sub>a</sub>  | 2     | 9    | 5     | 6     | 5     | 7     | 5     | 8     | 6     | 6        | 5.90 $\pm$ 0.61 |
|        |                       | N <sub>e</sub>  | 1.6   | 3.81 | 2.47  | 2.04  | 3.6   | 3.99  | 2.36  | 3.72  | 2.73  | 3.94     | 3.02 $\pm$ 0.28 |
|        |                       | N <sub>p</sub>  | 0     | 0    | 0     | 0     | 0     | 0     | 0     | 0     | 0     | 0        | 0               |
|        |                       | H <sub>o</sub>  | 0.35  | 0.65 | 0.54  | 0.62  | 0.58  | 0.81  | 0.46  | 0.69  | 0.54  | 0.54     | 0.58 $\pm$ 0.04 |
|        |                       | H <sub>E</sub>  | 0.38  | 0.74 | 0.59  | 0.51  | 0.72  | 0.75  | 0.58  | 0.73  | 0.63  | 0.75     | 0.64 $\pm$ 0.04 |
|        |                       | F <sub>IS</sub> | 0.08  | 0.11 | 0.09  | -0.21 | 0.2   | -0.08 | 0.2   | 0.05  | 0.15  | 0.28     | 0.11 **         |
|        | W-PGB ( <i>n</i> =28) | N <sub>a</sub>  | 2     | 9    | 4     | 6     | 6     | 4     | 4     | 7     | 5     | 7        | 5.40 $\pm$ 0.64 |
|        |                       | N <sub>e</sub>  | 2     | 5.3  | 2.27  | 1.97  | 4.87  | 2.09  | 2.8   | 3.87  | 3.66  | 4.13     | 3.30 $\pm$ 0.39 |
|        |                       | N <sub>p</sub>  | 0     | 0    | 0     | 0     | 0     | 0     | 0     | 0     | 0     | 0        | 0               |
|        |                       | H <sub>o</sub>  | 0.43  | 0.75 | 0.5   | 0.46  | 0.89  | 0.57  | 0.29  | 0.75  | 0.71  | 0.5      | 0.59 $\pm$ 0.06 |
|        |                       | H <sub>E</sub>  | 0.5   | 0.81 | 0.56  | 0.49  | 0.79  | 0.52  | 0.64  | 0.74  | 0.73  | 0.76     | 0.66 $\pm$ 0.04 |
|        |                       | F <sub>IS</sub> | 0.14  | 0.08 | 0.11  | 0.06  | -0.12 | -0.09 | 0.56  | -0.01 | 0.02  | 0.34     | 0.12 ***        |
|        | W-SJO ( <i>n</i> =28) | N <sub>a</sub>  | 2     | 10   | 2     | 3     | 5     | 5     | 4     | 8     | 6     | 5        | 5.00 $\pm$ 0.80 |
|        |                       | N <sub>e</sub>  | 1.85  | 4.98 | 1.32  | 1.81  | 4.6   | 2.93  | 2.51  | 4.93  | 2.93  | 3.42     | 3.13 $\pm$ 0.42 |
|        |                       | N <sub>p</sub>  | 0     | 0    | 0     | 0     | 0     | 0     | 0     | 0     | 0     | 0        | 0               |
|        |                       | H <sub>o</sub>  | 0.5   | 0.71 | 0.29  | 0.5   | 0.68  | 0.61  | 0.61  | 0.61  | 0.71  | 0.5      | 0.57 $\pm$ 0.04 |
|        |                       | H <sub>E</sub>  | 0.46  | 0.8  | 0.24  | 0.45  | 0.78  | 0.66  | 0.6   | 0.8   | 0.66  | 0.71     | 0.62 $\pm$ 0.06 |
|        |                       | F <sub>IS</sub> | -0.09 | 0.11 | -0.17 | -0.12 | 0.13  | 0.08  | -0.01 | 0.24  | -0.08 | 0.29     | 0.09 ***        |

**Additional file 4: Table S4.** Continued

|        |                   | Aealbmic        |       |       |       |       |       |      |       |       |       |          |                 |
|--------|-------------------|-----------------|-------|-------|-------|-------|-------|------|-------|-------|-------|----------|-----------------|
| Region | Sites             | Index           | 2     | 3     | 6     | 7     | 8     | 9    | 10    | 11    | 16    | Albtri45 | All $\pm$ SE    |
| East   | E-PCP ( $n=29$ )  | N <sub>a</sub>  | 2     | 9     | 4     | 4     | 6     | 6    | 4     | 6     | 5     | 6        | 5.20 $\pm$ 0.59 |
|        |                   | N <sub>e</sub>  | 1.92  | 5.08  | 2.56  | 2.04  | 4.5   | 3.84 | 2.2   | 4.27  | 2.5   | 4.31     | 3.32 $\pm$ 0.38 |
|        |                   | N <sub>p</sub>  | 0     | 0     | 0     | 0     | 0     | 0    | 0     | 0     | 0     | 0        | 0               |
|        |                   | H <sub>o</sub>  | 0.66  | 0.83  | 0.55  | 0.59  | 0.72  | 0.72 | 0.21  | 0.79  | 0.45  | 0.69     | 0.62 $\pm$ 0.06 |
|        |                   | H <sub>E</sub>  | 0.48  | 0.8   | 0.61  | 0.51  | 0.78  | 0.74 | 0.55  | 0.77  | 0.6   | 0.77     | 0.66 $\pm$ 0.04 |
|        |                   | F <sub>IS</sub> | -0.37 | -0.03 | 0.09  | -0.15 | 0.07  | 0.02 | 0.62  | -0.04 | 0.25  | 0.1      | 0.08 ***        |
|        | E-PCD ( $n=30$ )  | N <sub>a</sub>  | 2     | 11    | 4     | 4     | 6     | 6    | 5     | 8     | 5     | 6        | 5.70 $\pm$ 0.78 |
|        |                   | N <sub>e</sub>  | 1.72  | 6.55  | 1.87  | 1.8   | 4.26  | 4.83 | 2.83  | 4.63  | 3.06  | 4.7      | 3.62 $\pm$ 0.51 |
|        |                   | N <sub>p</sub>  | 0     | 0     | 0     | 0     | 0     | 0    | 0     | 0     | 0     | 0        | 0               |
|        |                   | H <sub>o</sub>  | 0.33  | 0.67  | 0.57  | 0.4   | 0.7   | 0.73 | 0.5   | 0.77  | 0.67  | 0.73     | 0.61 $\pm$ 0.05 |
|        |                   | H <sub>E</sub>  | 0.42  | 0.85  | 0.47  | 0.45  | 0.77  | 0.79 | 0.65  | 0.78  | 0.67  | 0.79     | 0.66 $\pm$ 0.05 |
|        |                   | F <sub>IS</sub> | 0.21  | 0.21  | -0.22 | 0.1   | 0.08  | 0.07 | 0.23  | 0.02  | 0.01  | 0.07     | 0.1 **          |
|        | E-PNDL ( $n=27$ ) | N <sub>a</sub>  | 2     | 13    | 3     | 6     | 5     | 5    | 4     | 7     | 6     | 6        | 5.70 $\pm$ 0.94 |
|        |                   | N <sub>e</sub>  | 1.93  | 7.25  | 1.64  | 2.41  | 2.67  | 3.26 | 1.98  | 4.66  | 2.98  | 3.84     | 3.26 $\pm$ 0.53 |
|        |                   | N <sub>p</sub>  | 0     | 0     | 0     | 0     | 0     | 0    | 0     | 0     | 0     | 0        | 0               |
|        |                   | H <sub>o</sub>  | 0.44  | 0.93  | 0.41  | 0.67  | 0.67  | 0.59 | 0.52  | 0.56  | 0.7   | 0.74     | 0.62 $\pm$ 0.05 |
|        |                   | H <sub>E</sub>  | 0.48  | 0.86  | 0.39  | 0.59  | 0.62  | 0.69 | 0.49  | 0.79  | 0.66  | 0.74     | 0.63 $\pm$ 0.05 |
|        |                   | F <sub>IS</sub> | 0.08  | -0.07 | -0.04 | -0.14 | -0.07 | 0.15 | -0.05 | 0.29  | -0.06 | 0        | 0.03            |

**Additional file 4: Table S4.** Continued

|        |                        | Aealbmic        |       |       |       |       |      |       |      |      |       |          |             |
|--------|------------------------|-----------------|-------|-------|-------|-------|------|-------|------|------|-------|----------|-------------|
| Region | Sites                  | Index           | 2     | 3     | 6     | 7     | 8    | 9     | 10   | 11   | 16    | Albtri45 | All ± SE    |
| East   | E-PBSB ( <i>n</i> =25) | N <sub>a</sub>  | 2     | 12    | 4     | 2     | 4    | 5     | 4    | 7    | 5     | 6        | 5.10 ± 0.91 |
|        |                        | N <sub>e</sub>  | 1.89  | 6.38  | 1.52  | 1.04  | 3.21 | 3.29  | 2.59 | 4.33 | 2.1   | 4.9      | 3.13 ± 0.53 |
|        |                        | N <sub>p</sub>  | 0     | 0     | 0     | 0     | 0    | 0     | 0    | 0    | 0     | 0        | 0           |
|        |                        | H <sub>o</sub>  | 0.36  | 0.76  | 0.4   | 0.04  | 0.44 | 0.64  | 0.48 | 0.48 | 0.48  | 0.56     | 0.47 ± 0.06 |
|        |                        | H <sub>E</sub>  | 0.47  | 0.84  | 0.34  | 0.04  | 0.69 | 0.7   | 0.61 | 0.77 | 0.52  | 0.8      | 0.58 ± 0.08 |
|        |                        | F <sub>IS</sub> | 0.24  | 0.1   | -0.17 | -0.02 | 0.36 | 0.08  | 0.22 | 0.38 | 0.08  | 0.3      | 0.21 ***    |
|        | E-PDA ( <i>n</i> =24)  | N <sub>a</sub>  | 2     | 10    | 5     | 3     | 5    | 5     | 4    | 7    | 5     | 7        | 5.30 ± 0.72 |
|        |                        | N <sub>e</sub>  | 1.95  | 7.84  | 2.32  | 1.71  | 4.4  | 3.06  | 2.43 | 3.99 | 2.88  | 4.55     | 3.51 ± 0.58 |
|        |                        | N <sub>p</sub>  | 0     | 0     | 0     | 0     | 0    | 0     | 0    | 0    | 0     | 0        | 0           |
|        |                        | H <sub>o</sub>  | 0.5   | 0.88  | 0.71  | 0.29  | 0.75 | 0.71  | 0.38 | 0.38 | 0.71  | 0.67     | 0.60 ± 0.06 |
|        |                        | H <sub>E</sub>  | 0.49  | 0.87  | 0.57  | 0.41  | 0.77 | 0.67  | 0.59 | 0.75 | 0.65  | 0.78     | 0.66 ± 0.05 |
|        |                        | F <sub>IS</sub> | -0.03 | 0     | -0.25 | 0.3   | 0.03 | -0.05 | 0.36 | 0.5  | -0.09 | 0.15     | 0.11 ***    |
|        | E-PBS ( <i>n</i> =29)  | N <sub>a</sub>  | 2     | 11    | 5     | 5     | 5    | 4     | 5    | 7    | 5     | 5        | 5.40 ± 0.73 |
|        |                        | N <sub>e</sub>  | 1.94  | 6.7   | 1.83  | 2.89  | 4.09 | 2.96  | 2.92 | 2.45 | 2.32  | 4.71     | 3.28 ± 0.48 |
|        |                        | N <sub>p</sub>  | 0     | 0     | 0     | 0     | 0    | 0     | 0    | 0    | 0     | 0        | 0           |
|        |                        | H <sub>o</sub>  | 0.41  | 0.86  | 0.38  | 0.28  | 0.69 | 0.69  | 0.34 | 0.55 | 0.34  | 0.79     | 0.53 ± 0.07 |
|        |                        | H <sub>E</sub>  | 0.49  | 0.85  | 0.45  | 0.65  | 0.76 | 0.66  | 0.66 | 0.59 | 0.57  | 0.79     | 0.65 ± 0.04 |
|        |                        | F <sub>IS</sub> | 0.15  | -0.01 | 0.16  | 0.58  | 0.09 | -0.04 | 0.48 | 0.07 | 0.39  | -0.01    | 0.19 ***    |

**Additional file 4: Table S4.** Continued

|        |              | Aealbmic        |       |       |       |       |       |       |      |       |      |          |             |
|--------|--------------|-----------------|-------|-------|-------|-------|-------|-------|------|-------|------|----------|-------------|
| Region | Sites        | Index           | 2     | 3     | 6     | 7     | 8     | 9     | 10   | 11    | 16   | Albtri45 | All ± SE    |
| Center | C-PTC (n=28) | N <sub>a</sub>  | 2     | 11    | 4     | 5     | 6     | 3     | 5    | 7     | 6    | 6        | 5.50 ± 0.78 |
|        |              | N <sub>e</sub>  | 1.96  | 8.86  | 1.35  | 2.96  | 4.01  | 2.51  | 2.24 | 3.92  | 3.16 | 4.28     | 3.52 ± 0.67 |
|        |              | N <sub>p</sub>  | 0     | 0     | 0     | 0     | 0     | 0     | 0    | 0     | 0    | 0        | 0           |
|        |              | H <sub>o</sub>  | 0.5   | 0.75  | 0.29  | 0.64  | 0.75  | 0.54  | 0.61 | 0.64  | 0.61 | 0.82     | 0.61 ± 0.05 |
|        |              | H <sub>E</sub>  | 0.49  | 0.89  | 0.26  | 0.66  | 0.75  | 0.6   | 0.55 | 0.74  | 0.68 | 0.77     | 0.64 ± 0.06 |
|        |              | F <sub>IS</sub> | -0.02 | 0.15  | -0.11 | 0.03  | 0     | 0.11  | -0.1 | 0.14  | 0.11 | -0.07    | 0.06 **     |
|        | C-PHY (n=29) | N <sub>a</sub>  | 2     | 10    | 4     | 5     | 6     | 5     | 5    | 8     | 4    | 5        | 5.40 ± 0.70 |
|        |              | N <sub>e</sub>  | 1.62  | 4.25  | 2.16  | 2.58  | 4.89  | 3.2   | 2.24 | 3.62  | 2.54 | 4.34     | 3.14 ± 0.35 |
|        |              | N <sub>p</sub>  | 0     | 0     | 0     | 0     | 1     | 0     | 0    | 0     | 0    | 0        | 1           |
|        |              | H <sub>o</sub>  | 0.31  | 0.79  | 0.59  | 0.59  | 0.69  | 0.72  | 0.38 | 0.83  | 0.59 | 0.76     | 0.62 ± 0.05 |
|        |              | H <sub>E</sub>  | 0.38  | 0.76  | 0.54  | 0.61  | 0.8   | 0.69  | 0.55 | 0.72  | 0.61 | 0.77     | 0.64 ± 0.04 |
|        |              | F <sub>IS</sub> | 0.19  | -0.04 | -0.09 | 0.04  | 0.13  | -0.05 | 0.32 | -0.14 | 0.03 | 0.01     | 0.05        |
|        | C-PDP (n=30) | N <sub>a</sub>  | 2     | 9     | 3     | 4     | 6     | 5     | 5    | 8     | 6    | 5        | 5.30 ± 0.67 |
|        |              | N <sub>e</sub>  | 1.97  | 4.26  | 1.57  | 1.79  | 3.81  | 3.21  | 1.7  | 5.19  | 2.01 | 4.56     | 3.00 ± 0.43 |
|        |              | N <sub>p</sub>  | 0     | 0     | 0     | 0     | 0     | 0     | 0    | 0     | 0    | 0        | 0           |
|        |              | H <sub>o</sub>  | 0.53  | 0.43  | 0.37  | 0.47  | 0.77  | 0.8   | 0.37 | 0.7   | 0.5  | 0.8      | 0.57 ± 0.06 |
|        |              | H <sub>E</sub>  | 0.49  | 0.77  | 0.36  | 0.44  | 0.74  | 0.69  | 0.41 | 0.81  | 0.5  | 0.78     | 0.60 ± 0.06 |
|        |              | F <sub>IS</sub> | -0.09 | 0.43  | -0.01 | -0.06 | -0.04 | -0.16 | 0.11 | 0.13  | 0.01 | -0.02    | 0.06 ***    |

**Additional file 4: Table S4.** Continued

|        |              | Aealbmic        |       |       |       |       |      |      |      |      |      |          |             |
|--------|--------------|-----------------|-------|-------|-------|-------|------|------|------|------|------|----------|-------------|
| Region | Sites        | Index           | 2     | 3     | 6     | 7     | 8    | 9    | 10   | 11   | 16   | Albtri45 | All ± SE    |
| Center | C-PSA (n=29) | N <sub>a</sub>  | 2     | 7     | 4     | 5     | 4    | 6    | 5    | 9    | 5    | 6        | 5.30 ± 0.60 |
|        |              | N <sub>e</sub>  | 1.53  | 4.7   | 1.8   | 2.12  | 3.09 | 3.5  | 2.9  | 5.61 | 2.18 | 3.88     | 3.13 ± 0.42 |
|        |              | N <sub>p</sub>  | 0     | 0     | 0     | 0     | 0    | 0    | 0    | 1    | 0    | 0        | 1           |
|        |              | H <sub>o</sub>  | 0.38  | 0.83  | 0.52  | 0.55  | 0.62 | 0.66 | 0.38 | 0.38 | 0.52 | 0.83     | 0.57 ± 0.05 |
|        |              | H <sub>E</sub>  | 0.35  | 0.79  | 0.44  | 0.53  | 0.68 | 0.71 | 0.65 | 0.82 | 0.54 | 0.74     | 0.63 ± 0.05 |
|        |              | F <sub>IS</sub> | -0.09 | -0.05 | -0.17 | -0.05 | 0.08 | 0.08 | 0.42 | 0.54 | 0.04 | -0.12    | 0.11 ***    |
