# Supplementary material for: High genetic diversity but no geographical structure of Aedes albopictus populations in Réunion Island
Source: Springer Nature journal article supplement (doi:10.1186/s13071-019-3840-x), 2019-12-01
Supplement: MOESM5 [file 13071_2019_3840_MOESM5_ESM.pdf]

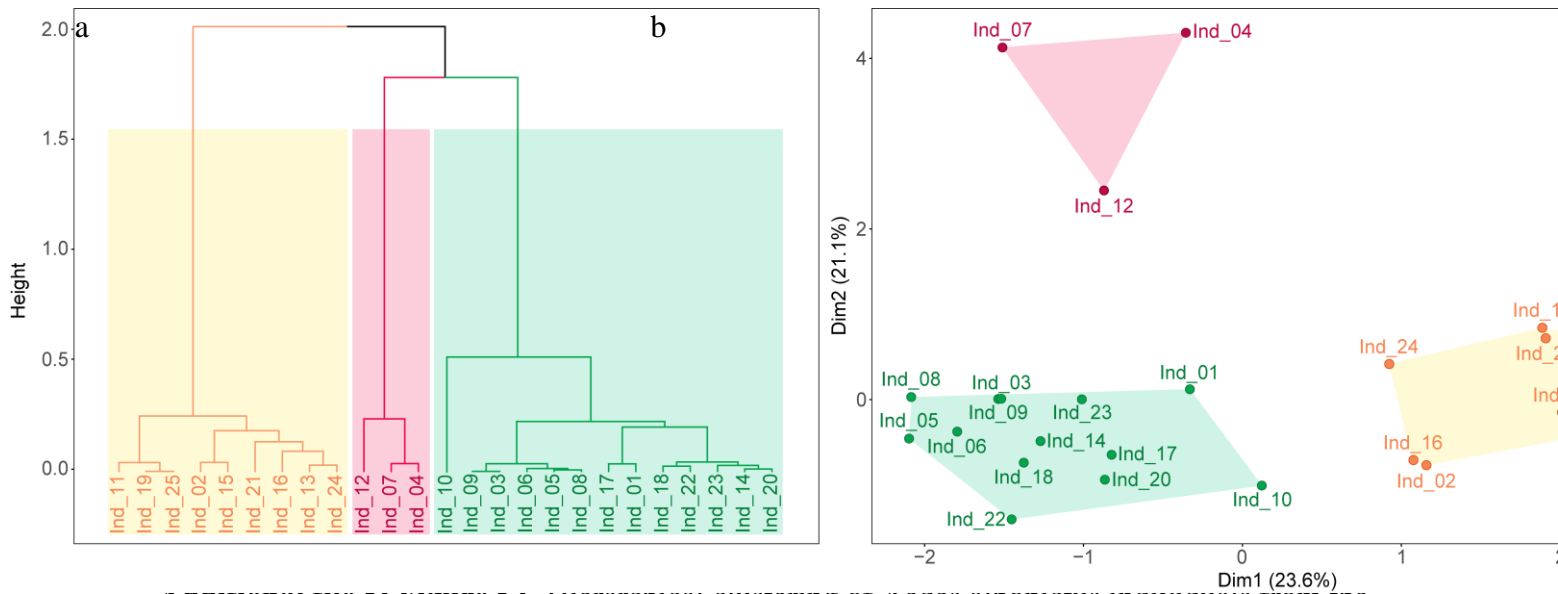

**Additional file 5: Figure S1.** Hierarchical clustering of *Aedes albopictus* individuals from the same population. Example showing the case of the population C-PSA ( $n = 25$  individuals). **a** Dendrogram generated by the hierarchical clustering. **b** Principal component analysis. *Abbreviation:* Ind, individual.
