# Supplementary material for: High genetic diversity but no geographical structure of Aedes albopictus populations in Réunion Island
Source: Springer Nature journal article supplement (doi:10.1186/s13071-019-3840-x), 2019-12-01
Supplement: MOESM7 [file 13071_2019_3840_MOESM7_ESM.pdf]

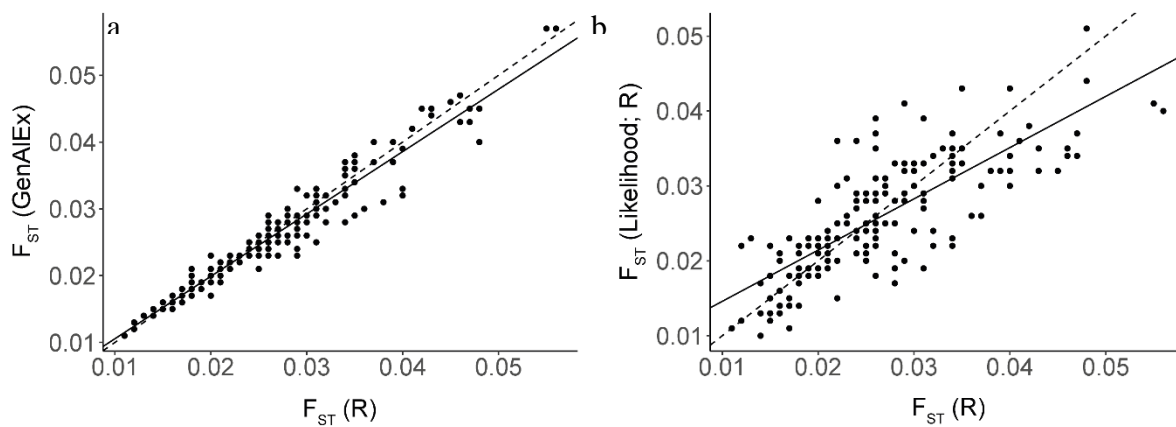

**Additional file 7: Figure S3.** Relationship between  $F_{ST}$  values for *Aedes albopictus* pairs of populations. (a) comparisons of  $F_{ST}$  estimated using R (eq. 1; x axis) and GenAIEEx v.6.5 [3] (y axis) without taking into account relatives;  $y = 0.93x + 1.2 \times 10^{-3}$  (Pearson test:  $n = 171$ ,  $t = 50.41$ ;  $R^2 = 0.94$ ;  $P < 10^{-5}$ ). (b) comparisons of  $F_{ST}$  estimated using R without taking relatives into account (x axis) and by taking relatives into account (y axis);  $y = 0.68x + 7.8 \times 10^{-3}$  (Pearson test:  $n = 171$ ,  $t = 16.48$ ;  $R^2 = 0.62$ ;  $P < 10^{-5}$ ). Full line: regression line; dotted line:  $y = x$ .
