# Supplementary material for: High genetic diversity but no geographical structure of Aedes albopictus populations in Réunion Island
Source: Springer Nature journal article supplement (doi:10.1186/s13071-019-3840-x), 2019-12-01
Supplement: MOESM8 [file 13071_2019_3840_MOESM8_ESM.pdf]

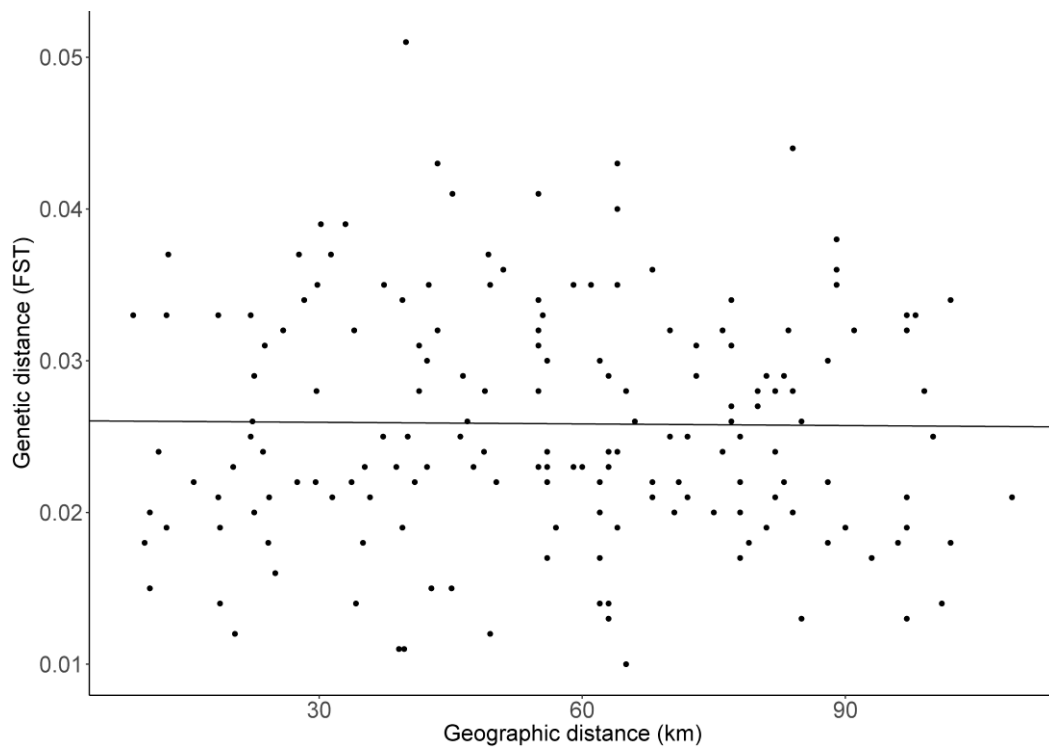

**Additional file 8: Figure S4.** Relationship between the  $F_{ST}$  and the distances by road calculated between pairs of mosquito populations.  $y = -3.58 \times 10^{-6} x + 2.61 \times 10^{-2}$  (Pearson test:  $n = 171$ ,  $t = -0.15$ ,  $R^2 = 1.36 \times 10^{-4}$ ,  $P = 0.88$ ).
